# Supplementary material for: Specific Cu(ii) detection using a novel tricarbazolyl-tristriazolotriazine based on photoinduced charge transfer
Source: Royal Society of Chemistry journal article supplement (doi:10.1039/c3ra46239k), 2014-01-01
Supplement: c3ra46239k1.pdf [file c3ra46239k1.pdf]

## Electronic Supplementary Information

# Specific Cu(II) detection using a novel tricarbazolyl-tristriazolotriazine based on photoinduced charge transfer

He Zhao, Yongtao Wang\*, Zhiyong Liu\* and Bin Dai

(School of Chemistry and Chemical Engineering/Key Laboratory for Green Processing of Chemical Engineering of Xinjiang Bingtuan, Shihezi University, Shihezi 832003, P. R. China)

Fig. S1. (a)  $^1\text{H}$  NMR and (b)  $^{13}\text{C}$  NMR spectra of compound 5 ( $\text{CDCl}_3$ ), and (c)  $^1\text{H}$  NMR spectra of compound 7 ( $\text{CDCl}_3$ ).

Fig. S2. (a) LRMS and (b) HRMS spectra of compound 5, (c) LRMS spectra of compound 7.

Fig. S3. Fluorescence spectra of compound 7 with varying concentrations of  $\text{Cu}^{2+}$  (from 0.4 to 2.0 mM);  $\lambda_{\text{ex}} = 278$  nm.

Fig. S4. Calibration plots of relative  $F/F_0$  of the compound 5 and 7 against different concentrations of  $\text{Cu}^{2+}$ .  $F_0$  and  $F$  stand for the fluorescent intensities in the absence and presence of  $\text{Cu}^{2+}$ .

Fig. S5. TGA and DSC (inset) thermograms of compound 5 recorded under nitrogen atmosphere at the heating rate of  $10^\circ\text{C min}^{-1}$ .

Fig. S6. Representative cyclic voltammogram of compound 5 measured in dry dichloromethane solution, containing 0.1 M TBAPF<sub>6</sub> at  $25^\circ\text{C}$ . Scan rate 200 mV s.

Fig. S7. SEM microphotographs of compound 5 formed in the DCM/EA mixtures.

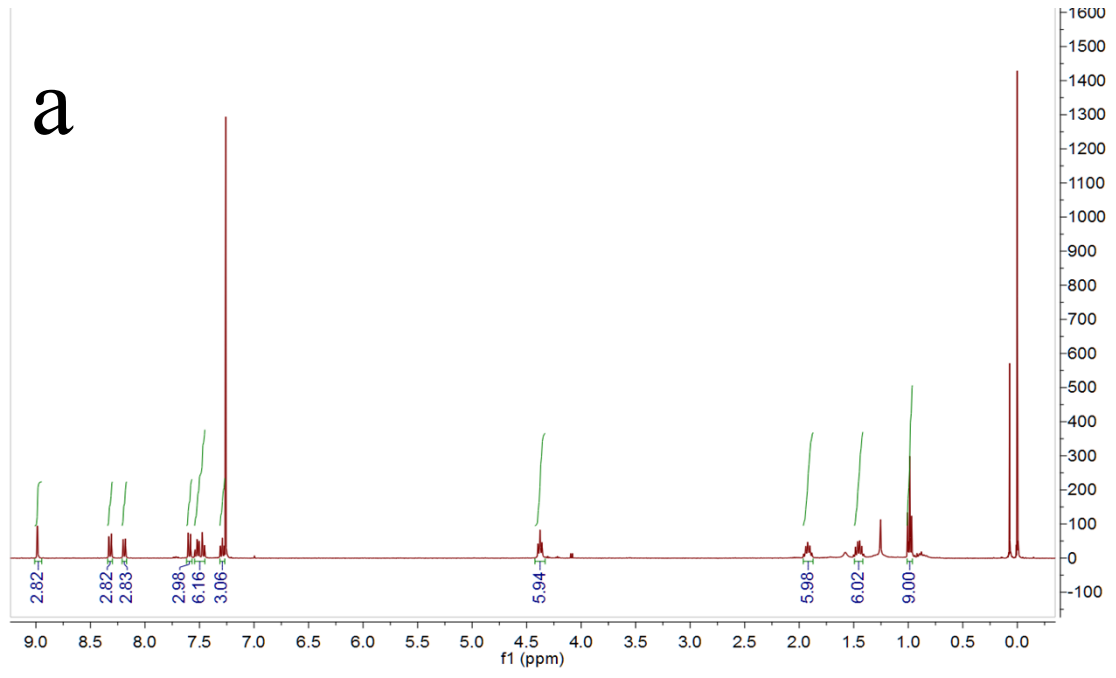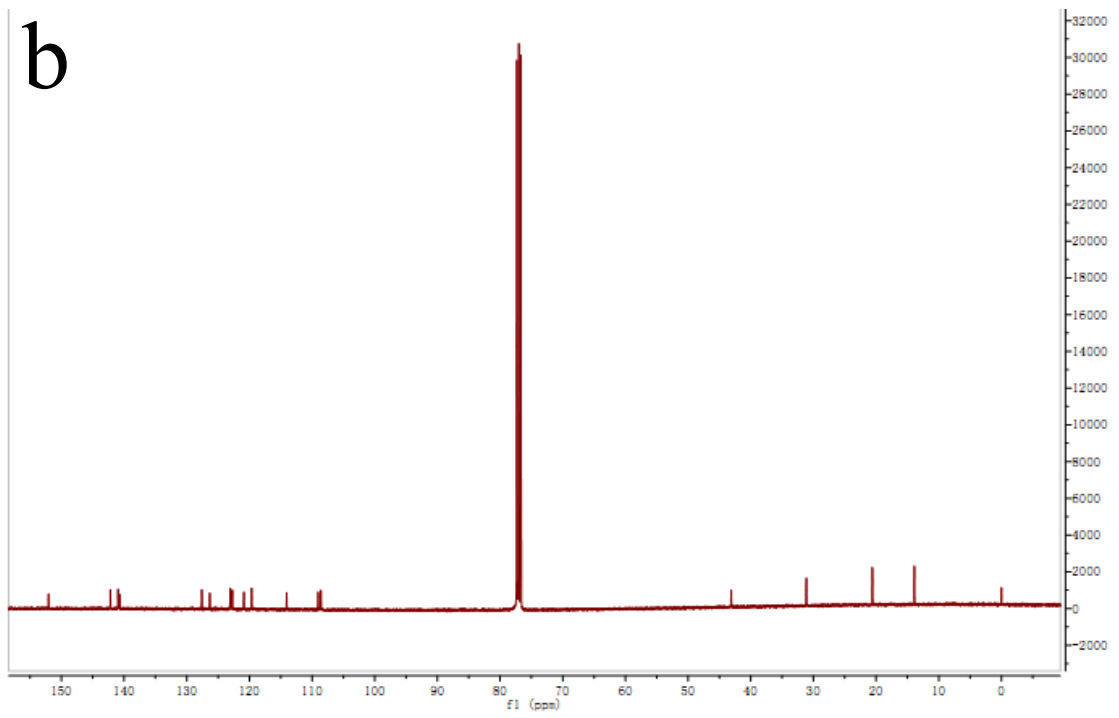

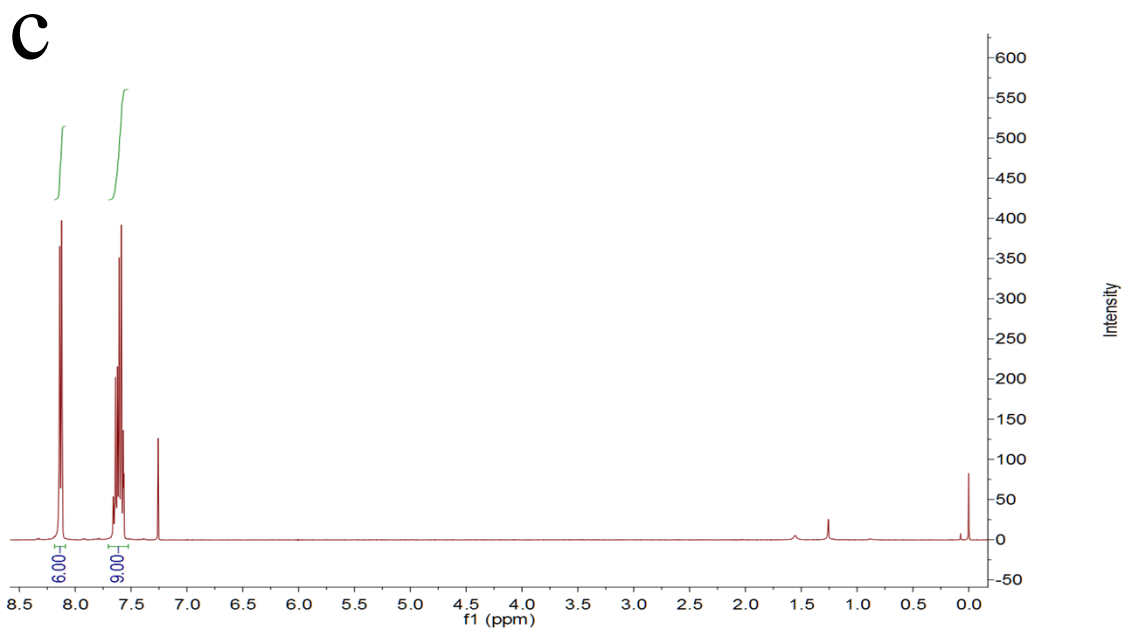

Fig. S1. (a)  $^1\text{H}$  NMR and (b)  $^{13}\text{C}$  NMR spectra of compound 5 ( $\text{CDCl}_3$ ), and (c)  $^1\text{H}$  NMR spectra of compound 7 ( $\text{CDCl}_3$ ).

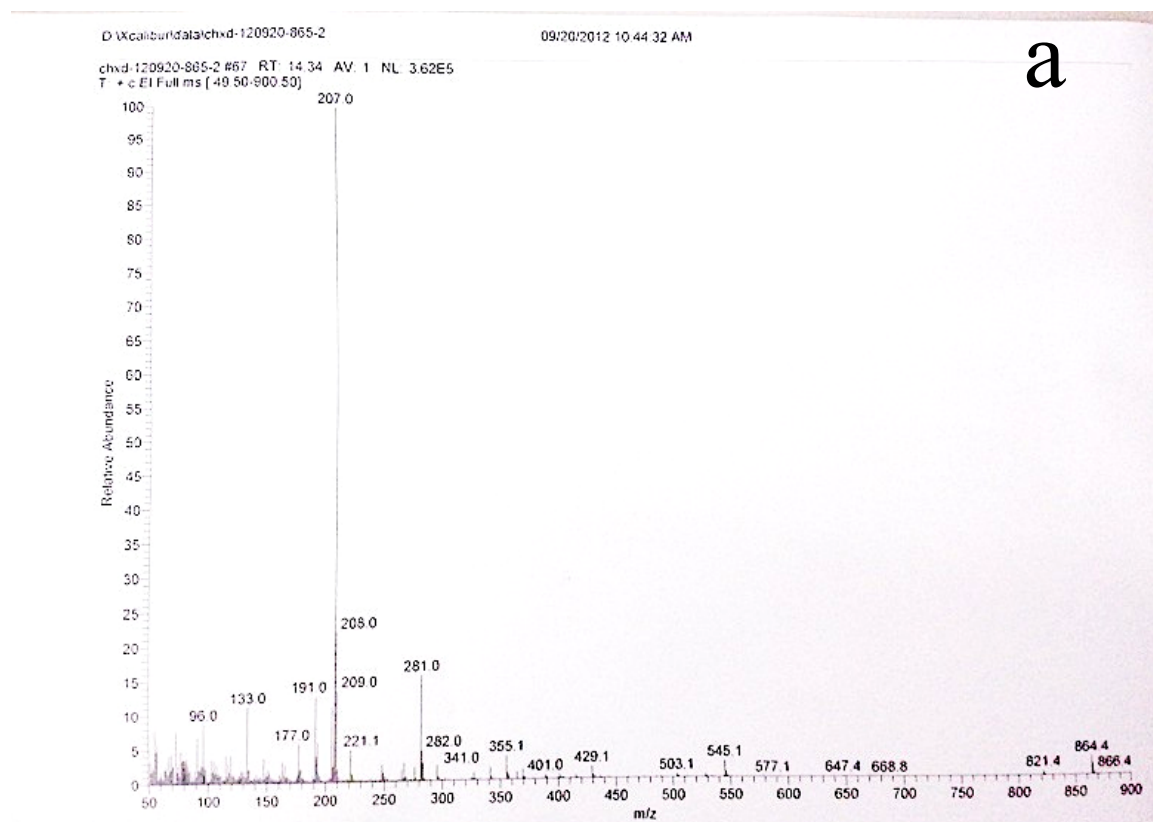

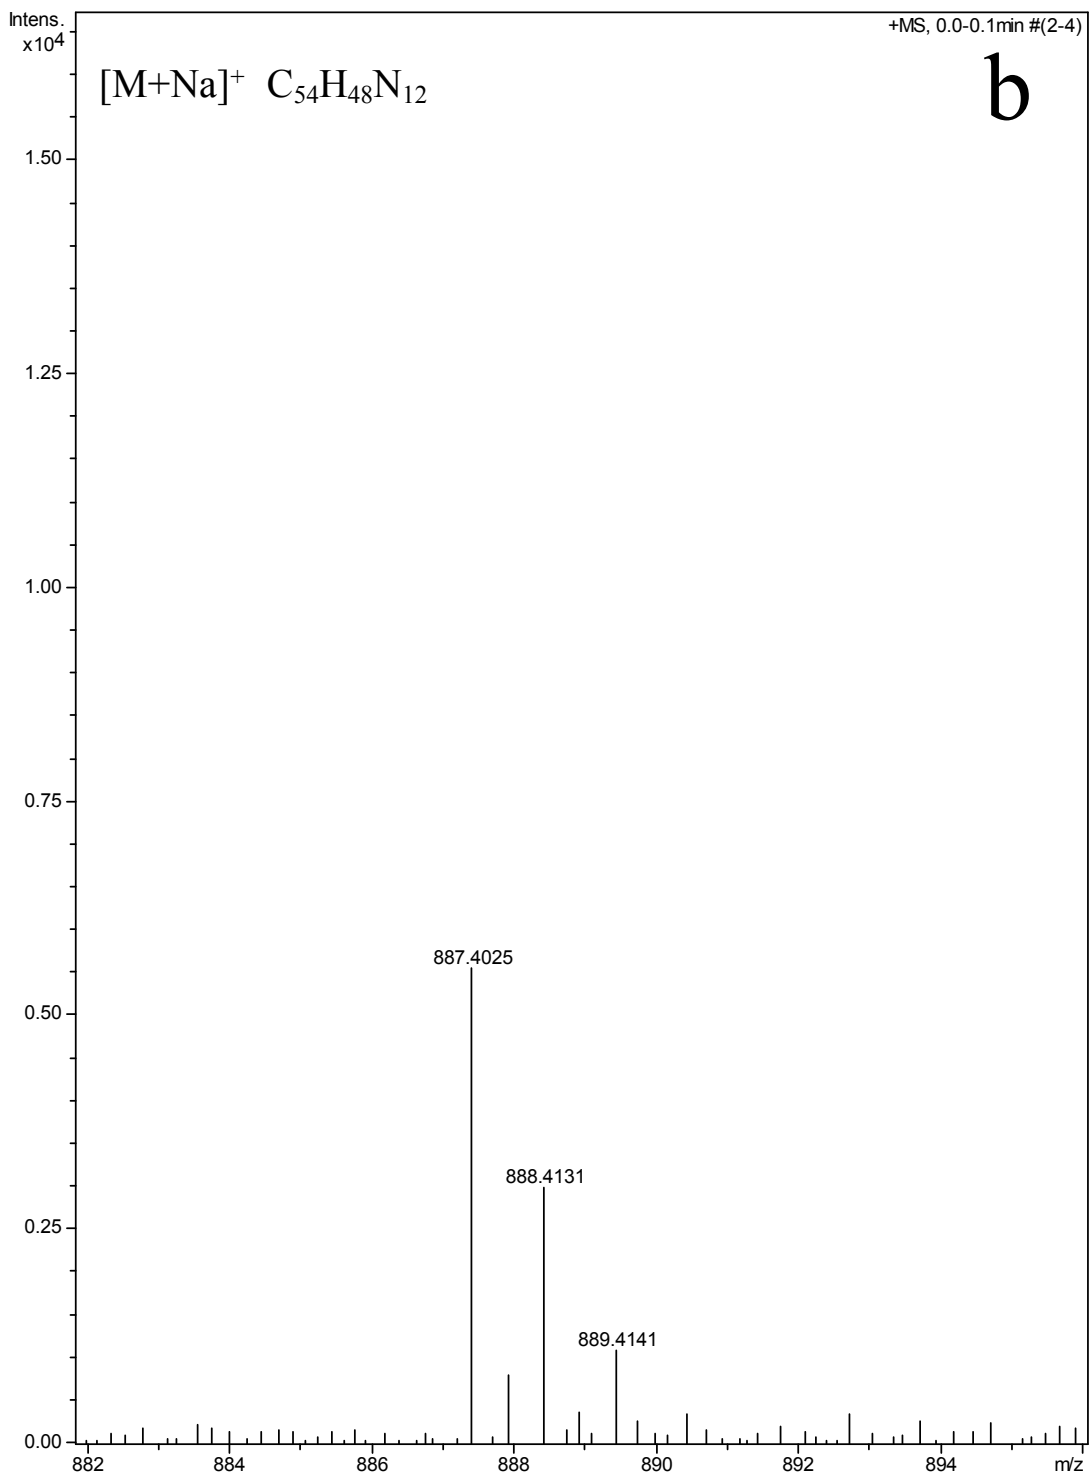

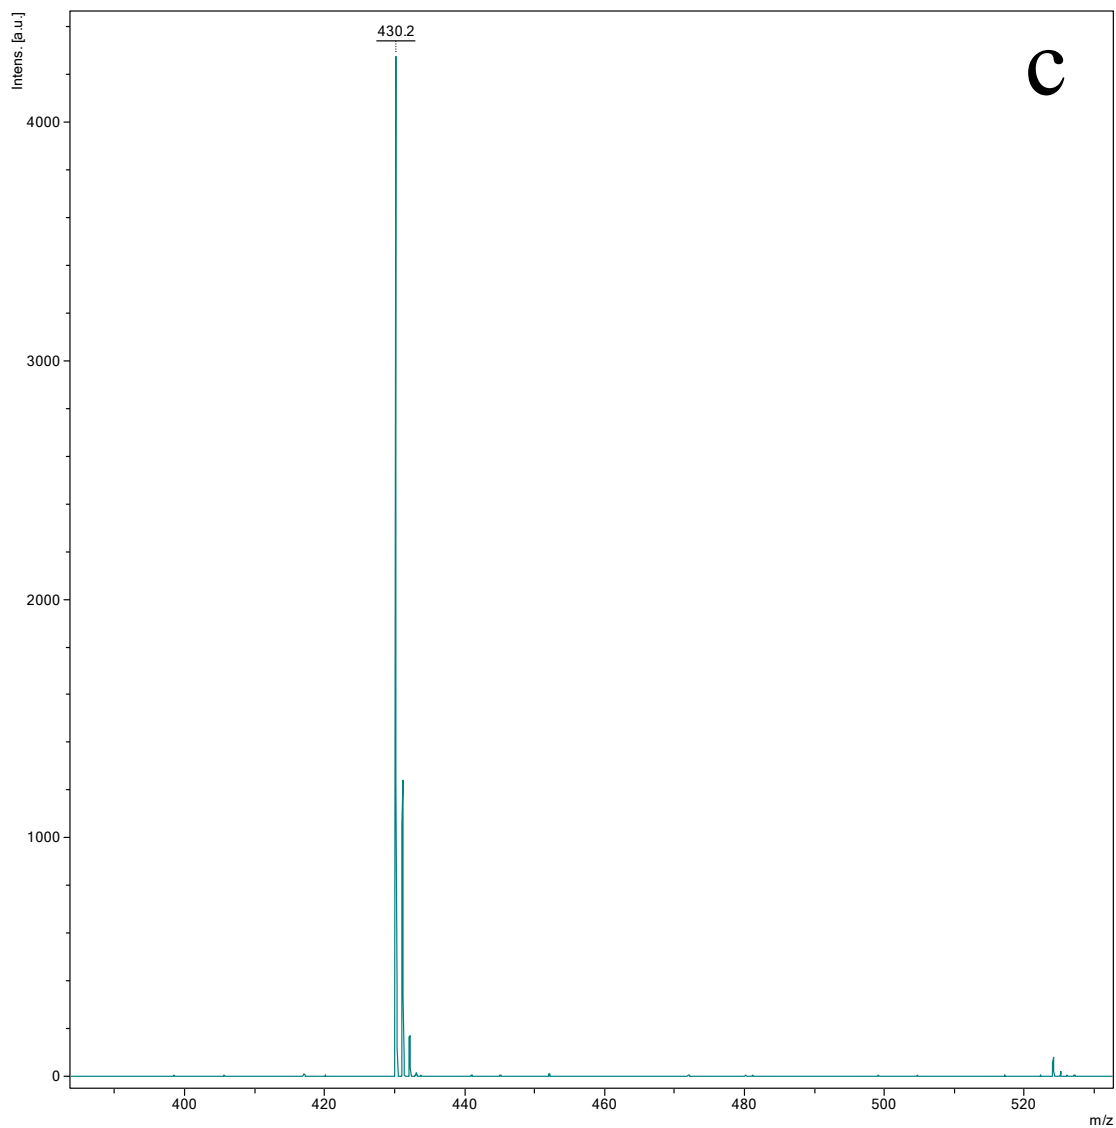

Fig. S2. (a) LRMS and (b) HRMS spectra of compound 5, (c) LRMS spectra of compound 7

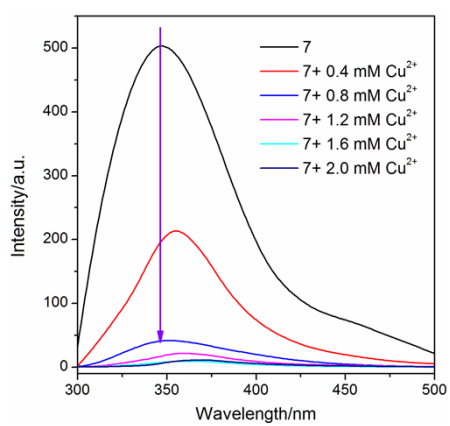

Fig. S3. Fluorescence spectra of compound 7 with varying concentrations of  $\text{Cu}^{2+}$  (from 0.4 to 2.0 mM);  $\lambda_{\text{ex}} = 278$  nm.

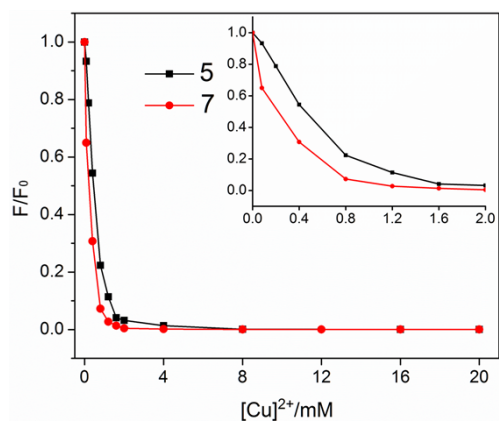

Fig. S4. Calibration plots of relative  $F/F_0$  of the compound 5 and 7 against different concentrations of  $\text{Cu}^{2+}$ .  $F_0$  and  $F$  stand for the fluorescent intensities in the absence and presence of  $\text{Cu}^{2+}$ .

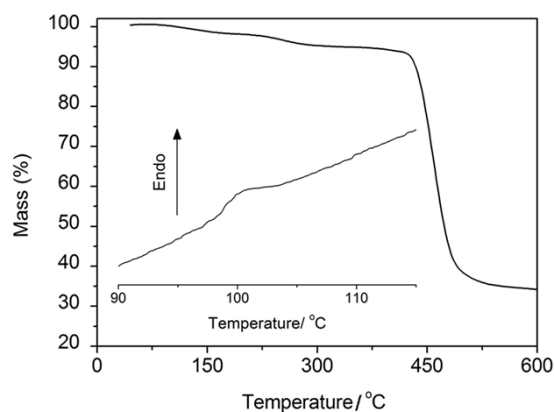

Fig. S5. TGA and DSC (inset) thermograms of compound 5 recorded under nitrogen atmosphere at the heating rate of  $10\text{ }^\circ\text{C min}^{-1}$ .

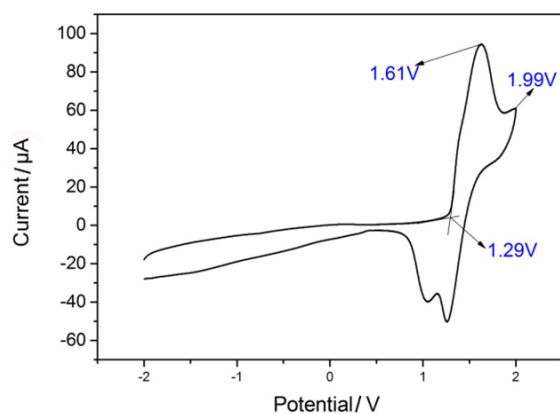

Fig. S6. Representative cyclic voltammogram of compound 5 measured in dry dichloromethane solution, containing  $0.1\text{ M TBAPF}_6$  at  $25\text{ }^\circ\text{C}$ . Scan rate  $200\text{ mV s}$ .

$$E_{\text{HOMO}} = -(1.29 + 4.38)\text{ eV} = -5.67\text{ eV}; E_{\text{LUMO}} = E_{\text{HOMO}} + E_g = -5.67 + 4.09 = -1.58\text{ eV}$$

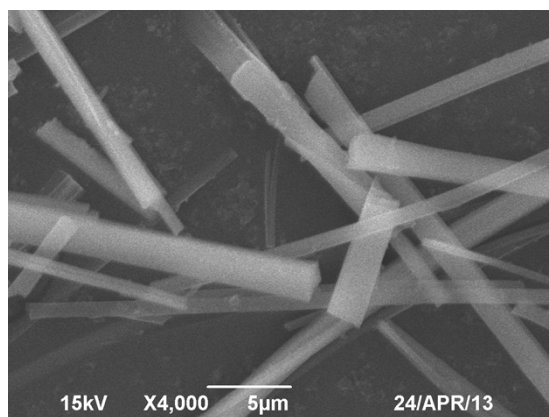

Fig. S7. SEM microphotographs of compound 5 formed in the DCM/EA mixtures.
